# Supplementary material for: Can assistive technology support social services during Covid-19 emergency? Barriers and opportunities
Source: Springer Nature journal article supplement (doi:10.1007/s12008-021-00836-3), 2022-02-03
Supplement: MOESM3 [file 20099050]

## Supplementary Material

**Article Title:** Can Assistive Technology support social services during Covid-19 emergency? Barriers and Opportunities

**Journal Name:** International Journal of Interactive Design and Manufacturing

**Author Names:** Laura Fiorini, Erika Rovini, Alessandra Sorrentino, Omair Khalid, Luigi Coviello, Lorenzo Radi, Lara Toccafondi and Filippo Cavallo

**Corresponding Author contact:** Laura Fiorini, Università degli studi di Firenze, Dipartimento di Ingegneria Industriale, e-mail: laura.fiorini@unifi.it

### Questionnaire on the use of technology

#### Before and After Covid-19

##### INFORMED CONSENT

We propose you to fill in the following questionnaire on this Google Form platform in order to investigate the expectation toward social robots and sensors such as to investigate suitable future scenarios. Participation in the questionnaire is anonymous and voluntary.

The answers, elaborated in aggregate form by the BioRobotics Institute of Scuola Superiore Sant'Anna, by the team coordinated by Prof. Filippo Cavallo (filippo.cavallo@santannapisa.it), can in no way be linked back to your identity.

This data may be used for future publications including, but not limited to: academic journals, websites and policy papers

If you agree with this statement, please click on "continue".

#### First part: Socio demographic information

SD1 - Age Range

- 1) <30 2) 31-45 3)46-55 4) 56-65 5) <66

SD2 - What is my job?

#### Second part: Expectation toward technology

Q1: I think that technology can be useful for my work

- 1) Strongly Disagree 2) Disagree 3) Neither Agree nor Disagree 4) Agree 5) Strongly agree

Q2: I think that technology can be useful for elderly

- 1) Strongly Disagree 2) Disagree 3) Neither Agree nor Disagree 4) Agree 5) Strongly agree

Q3: I think that robot...[evaluate the sentences]

| Code  | Items                                                                                         | Strongly Disagree | Disagree | Neither agree nor disagree | Agree | Strongly agree |
|-------|-----------------------------------------------------------------------------------------------|-------------------|----------|----------------------------|-------|----------------|
| Q3.1  | Will be useful in my job                                                                      |                   |          |                            |       |                |
| Q3.2  | Could help and assist older person                                                            |                   |          |                            |       |                |
| Q3.3  | Could help and assist their family                                                            |                   |          |                            |       |                |
| Q3.4  | Could "stole" your job                                                                        |                   |          |                            |       |                |
| Q3.5  | Could introduce new job opportunities                                                         |                   |          |                            |       |                |
| Q3.6  | Could reduce the need of the presence of the caregiver                                        |                   |          |                            |       |                |
| Q3.7  | Could increase the psychological distance between the social operator and the older person    |                   |          |                            |       |                |
| Q3.8  | Could help to maintain social relationship if older persons and families are distant          |                   |          |                            |       |                |
| Q3.9  | Could increase the sense of security                                                          |                   |          |                            |       |                |
| Q3.10 | Could be useful into emergency situation                                                      |                   |          |                            |       |                |
| Q3.11 | Is a negative element in the relationship between the social operators and the older persons. |                   |          |                            |       |                |

Q4: I think that sensors...[evaluate the sentences]

| Code | Items                                                                                      | Strongly Disagree | Disagree | Neither agree nor disagree | Agree | Strongly agree |
|------|--------------------------------------------------------------------------------------------|-------------------|----------|----------------------------|-------|----------------|
| Q4.1 | Will be useful in my job                                                                   |                   |          |                            |       |                |
| Q4.2 | Could help and assist older person                                                         |                   |          |                            |       |                |
| Q4.3 | Could help and assist their family                                                         |                   |          |                            |       |                |
| Q4.4 | Could "stole" your job                                                                     |                   |          |                            |       |                |
| Q4.5 | Could introduce new job opportunities                                                      |                   |          |                            |       |                |
| Q4.6 | Could reduce the need of the presence of the caregiver                                     |                   |          |                            |       |                |
| Q4.7 | Could increase the psychological distance between the social operator and the older person |                   |          |                            |       |                |
| Q4.8 | Could help to maintain social relationship if older persons and families are distant       |                   |          |                            |       |                |

|       |                                                                                               |  |  |  |  |  |
|-------|-----------------------------------------------------------------------------------------------|--|--|--|--|--|
| Q4.9  | Could increase the sense of security                                                          |  |  |  |  |  |
| Q4.10 | Could be useful into emergency situation                                                      |  |  |  |  |  |
| Q4.11 | Is a negative element in the relationship between the social operators and the older persons. |  |  |  |  |  |

Q5: Think about a possible scenario in which the technology could support your work

---

---

**[Section to fill only after the covid-19 emergency]**

**Third part: Technology during covid-19 emergency**

Q6 - What technology I would like to use in my work to cope with the emergency I am experiencing (choose a maximum of 3 options)?

*[Telepresence System & Video Call; Smartphone/Tablet; Physiological parameter monitoring system; Robot; Robotic Sanification; Remote Monitoring of person positive to Covid-19; sensors, other]*

Q7 - What technology have I introduced into my work to cope with the emergency?

*[Telepresence System & Video Call; Smartphone/Tablet; Physiological parameter monitoring system; Robot; Robotic Sanification; Remote Monitoring of person positive to Covid-19; sensors, other]*

Q8 - What are the barriers I experienced during the Covid-19 emergency for the introduction of technologies? [Choose one or more option]

*[Lack of ready-To-Use Technology; Difficulty in internet connection; Lack of money to buy technology; Lack of organizational infrastructure for the correct management of technology; other]*

Q9 – What is necessary to change/update in the service's models so that to include this technology?

Q10 - Do you think that we can come back to an elderly assistance situation which is the same of the one before the emergency or it is necessary to include some changes in the way we model the services?

Q11 - Imagine a scenario where technology can be introduced within the social and health care processes
